# Supplementary material for: Public Reporting and Pay for Performance in Hospital Quality Improvement
Source: Atypon-hosted journal article supplement (doi:10.1056/nejmsa064964), 2007-01-26
Supplement: nejm_lindenhauer_486sa1.pdf [file nejm_lindenhauer_486sa1.pdf]

## Supplementary Appendix

This appendix has been provided by the authors to give readers additional information about their work.

Supplement to: Lindenauer PK, Remus D, Roman S, et al. Public reporting and pay for performance in hospital quality improvement. *N Engl J Med* 2007;356:486-96.

Web Only Appendix Table 2a. Characteristics and comparison of hospitals that declined and those that volunteered for pay-for-performance.

| Hospital characteristics | Hospitals that Declined to Participate in Pay-for-Performance<br>(n=155) | Hospitals Participating in Both Pay-for-Performance + Public Reporting<br>(n=207) | P value* |
|--------------------------|--------------------------------------------------------------------------|-----------------------------------------------------------------------------------|----------|
|                          | n(%)                                                                     | n(%)                                                                              |          |
| Bed size                 |                                                                          |                                                                                   |          |
| <200                     | 83 (53.5%)                                                               | 63 (30.4%)                                                                        | <0.001   |
| 200-400                  | 46 (29.7%)                                                               | 77 (37.2%)                                                                        |          |

|                 |             |             |        |
|-----------------|-------------|-------------|--------|
| >401            | 26 (16.8%)  | 67 (32.4%)  |        |
| Location        |             |             |        |
| Rural           | 44 (28.4%)  | 36 (17.4%)  | 0.01   |
| Urban           | 111 (71.6%) | 171 (82.6%) |        |
| Teaching Status |             |             |        |
| Teaching        | 38 (24.5%)  | 97 (46.9%)  | <0.001 |
| Non-Teaching    | 117 (75.5%) | 110 (53.1%) |        |
| Region          |             |             |        |
| Midwest         | 36 (23.2%)  | 45 (21.7%)  | 0.06   |
| Northeast       | 18 (11.6%)  | 28 (13.5%)  |        |

|                |             |             |      |
|----------------|-------------|-------------|------|
| South          | 67 (43.2%)  | 109 (52.7%) |      |
| West           | 34 (21.9%)  | 25 (12.1%)  |      |
| Ownership      |             |             |      |
| For-profit     | 7 (4.5%)    | 4 (1.9%)    | 0.27 |
| Not-for profit | 148 (95.5%) | 203 (98.1%) |      |

- Chi-square test was performed for hospital characteristics between declined pay-for-performance and pay-for-performance + public reporting groups.

Web Only Appendix Table 3a Improvements in quality over 2 years among hospitals that declined and those that volunteered for pay-for-performance.

|                  | Pay for Performance + Public Reporting<br>(n=207)* |                       |                    | Declined Pay for Performance + Public<br>Reporting (n=155) |                       |                     | Comparison                                            |             |
|------------------|----------------------------------------------------|-----------------------|--------------------|------------------------------------------------------------|-----------------------|---------------------|-------------------------------------------------------|-------------|
|                  | Start rate<br>(Q4/2003)                            | End rate<br>(Q3/2005) | Absolute<br>change | Start rate<br>(Q4/2003)                                    | End rate<br>(Q3/2005) | Absolut<br>e change | Difference<br>between absolute<br>changes<br>(95% CI) | P<br>value# |
| <b>Acute MI</b>  |                                                    |                       |                    |                                                            |                       |                     |                                                       |             |
| ASA on arrival   | 8,675 (92.6%)                                      | 7,148 (96.3%)         | 3.7%               | 2721 (94.3%)                                               | 2,256 (95.3%)         | 1.0%                | 2.7% (-0.7 - 6.0)                                     | 0.04        |
| ASA at discharge | 10,808 (93.9%)                                     | 8,867 (95.9%)         | 2.1%               | 2,817 (92.3%)                                              | 2,278 (94.0%)         | 1.7%                | 0.3% (-2.9 - 3.6)                                     | 0.85        |
| ACE for LVSD     | 2,360 (77.5%)                                      | 2,101 (88.8%)         | 11.3%              | 594 (76.2%)                                                | 457 (84.4%)           | 8.1%                | 3.1% (-3.8 - 10.0)                                    | 0.37        |

|                      |                |                |       |               |               |       |                    |       |
|----------------------|----------------|----------------|-------|---------------|---------------|-------|--------------------|-------|
| BB on arrival        | 10,752 (88.4%) | 9,194 (95.7%)  | 7.3%  | 2,838 (90.3%) | 2,342 (94.7%) | 4.4%  | 2.9% (-0.1 - 5.8)  | 0.06  |
| BB at discharge      | 7,513 (87.6%)  | 5,644 (93.2%)  | 5.6%  | 2,426 (87.8%) | 1,813 (92.2%) | 4.4%  | 1.2% (-2.3 - 4.8)  | 0.48  |
| <b>Heart failure</b> |                |                |       |               |               |       |                    |       |
| LV assessment        | 18,240 (83.3%) | 15,704 (93.3%) | 10.0% | 6,023 (83.2%) | 5202 (89.5%)  | 6.4%  | 3.7% (-0.0 - 7.4)  | 0.08  |
| ACE for LVSD         | 6,079 (78.0%)  | 6,308 (86.5%)  | 8.5%  | 1,782 (73.3%) | 1725 (84.5%)  | 11.2% | -2.7% (-8.1 - 2.7) | 0.32  |
| <b>Pneumonia</b>     |                |                |       |               |               |       |                    |       |
| Antibiotic timing    | 19,406 (67.8%) | 8,776 (79.6%)  | 11.8% | 8,371 (72.7%) | 3,804 (77.1%) | 4.4%  | 7.4% (4.2 - 10.6)  | <.001 |
| Vaccination          | 10,490 (42.6%) | 6,108 (72.7%)  | 30.0% | 4,487 (38.4%) | 2,609 (67.8%) | 29.4% | 0.6% (-5.8 - 7.0)  | 0.85  |
| O2 assessment        | 20,546 (98.0%) | 10,723 (99.6%) | 1.6%  | 8,673 (98.1%) | 4,572 (99.6%) | 1.6%  | 0.1% (-0.9 - 1.0)  | 0.92  |

|                                     |                |                |       |                |                |       |                   |      |
|-------------------------------------|----------------|----------------|-------|----------------|----------------|-------|-------------------|------|
| <b>Appropriate care<br/>measure</b> |                |                |       |                |                |       |                   |      |
| Acute MI                            | 13,769 (77.4%) | 11,720 (88.4%) | 11.0% | 3,893 (79.2%)  | 3,171 (85.9%)  | 6.7%  | 4.3% (-0.5 - 9.2) | 0.08 |
| Heart failure                       | 18,274 (76.2%) | 15,836 (88.2%) | 12.0% | 6,049 (75.6%)  | 5,204 (84.8%)  | 9.2%  | 2.9% (-1.3 - 7.0) | 0.22 |
| Pneumonia                           | 20,554 (48.4%) | 10,724 (70.5%) | 22.2% | 8,673 (48.2%)  | 4,573 (65.9%)  | 17.7% | 4.4% (0.2 - 8.7)  | 0.03 |
| <b>Composite process<br/>score</b>  |                |                |       |                |                |       |                   |      |
| Acute MI                            | 41,084 (88.5%) | 33,707 (94.4%) | 5.9%  | 12,056 (89.9%) | 9,482 (93.5%)  | 3.6%  | 2.3% (-0.5 - 5.1) | 0.13 |
| Heart failure                       | 24,576 (81.4%) | 22,405 (91.5%) | 10.1% | 8,035 (80.8%)  | 6,991 (87.9%)  | 7.1%  | 3.0% (-0.6 - 6.6) | 0.10 |
| Pneumonia                           | 50,779 (75.1%) | 25,878 (86.3%) | 11.2% | 21,695 (75.7%) | 11,021 (84.2%) | 8.5%  | 2.7% (0.5 - 4.9)  | 0.01 |

|                 |                 |                |      |                |                |      |                  |      |
|-----------------|-----------------|----------------|------|----------------|----------------|------|------------------|------|
| All 10 measures | 116,613 (81.0%) | 96,695 (90.5%) | 9.6% | 41,846 (80.3%) | 31,968 (87.8%) | 7.5% | 2.1% (0.1 - 4.0) | 0.04 |
|-----------------|-----------------|----------------|------|----------------|----------------|------|------------------|------|

Notes

ASA = aspirin

ACE = angiotensin converting enzyme inhibitor

LV = left ventricular

LVSD = left ventricular systolic dysfunction

BB = beta blocker

MI = myocardial infarction

- Because matching was carried out at the hospital, but not the measure level, the figures reported here differ slightly from those in Table 3.

#Student T test was performed to compare the difference in absolute percentage change between Pay for Performance + Public

Reporting and Declined groups.

Table 4a. Effect of teaching status and hospital size on improvement among hospitals engaged in pay-for-performance and public reporting initiatives.

|                            | Hospital characteristics | Pay-for-performance + Public Reporting |                       |                     | Public Reporting        |                       |                     | Comparison                                   |          |
|----------------------------|--------------------------|----------------------------------------|-----------------------|---------------------|-------------------------|-----------------------|---------------------|----------------------------------------------|----------|
|                            |                          | Start rate<br>(Q4/2003)                | End rate<br>(Q3/2005) | Absolute<br>change# | Start rate<br>(Q4/2003) | End rate<br>(Q3/2005) | Absolute<br>change# | Difference<br>between<br>absolute<br>changes | P value§ |
| Composite<br>Process Score | Teaching status          |                                        |                       |                     |                         |                       |                     |                                              |          |
| <b>Acute MI</b>            | Teaching                 | 30,556 (90.7%)                         | 24,279 (94.8%)        | 4.1%*               | 52,363 (92.6%)          | 42,336 (94.7%)        | 2.1%                | 2.0%                                         | 0.007    |

|                        |              |                |                |         |                 |                 |      |      |        |
|------------------------|--------------|----------------|----------------|---------|-----------------|-----------------|------|------|--------|
|                        | Non Teaching | 10,528 (86.2%) | 9,428 (94.0%)  | 7.8%    | 20,237 (89.8%)  | 16,607 (91.7%)  | 1.9% | 5.9% | <0.001 |
|                        |              |                |                |         |                 |                 |      |      |        |
| <b>Heart failure</b>   | Teaching     | 15,852 (84.9%) | 14,333 (92.2%) | 7.4% ** | 26,060 (85.9%)  | 23,664 (90.7%)  | 4.8% | 2.6% | 0.02   |
|                        | Non Teaching | 8,724 (78.3%)  | 8,072 (90.8%)  | 12.5%   | 14,543 (80.8%)  | 13,145 (86.7%)  | 5.9% | 6.6% | <0.001 |
|                        |              |                |                |         |                 |                 |      |      |        |
| <b>Pneumonia</b>       | Teaching     | 29,698 (73.3%) | 15,154 (85.5%) | 12.2%   | 41,778 (74.5%)  | 21,638 (82.3%)  | 7.8% | 4.4% | <0.001 |
|                        | Non Teaching | 21,081 (76.6%) | 10,724 (87.0%) | 10.4%   | 37,067 (76.9%)  | 17,790 (83.7%)  | 6.8% | 3.6% | 0.003  |
|                        |              |                |                |         |                 |                 |      |      |        |
| <b>All 10 measures</b> | Teaching     | 76,106 (82.6%) | 63,793 (91.2%) | 8.6%    | 120,208 (84.8%) | 106,388 (89.9%) | 5.1% | 3.5% | <0.001 |

|                      |              |                |                |          |                |                |      |       |        |
|----------------------|--------------|----------------|----------------|----------|----------------|----------------|------|-------|--------|
|                      | Non Teaching | 40,507 (79.6%) | 32,902 (90.0%) | 10.4%    | 72,173 (81.2%) | 59,417 (86.6%) | 5.5% | 4.9%  | <0.001 |
|                      |              |                |                |          |                |                |      |       |        |
| Composite            |              |                |                |          |                |                |      |       |        |
| Process Score        | Bed size     |                |                |          |                |                |      |       |        |
| <b>Acute MI</b>      | <200         | 2,636 (83.6%)  | 2,095 (92.8%)  | 9.1%     | 4,463 (88.2%)  | 3,830 (90.3%)  | 2.2% | 6.9%  | 0.01   |
|                      | 200-400      | 13,248 (90.0%) | 11,293 (94.8%) | 4.8%     | 25,853 (91.2%) | 21,256 (93.6%) | 2.5% | 2.3%  | 0.04   |
|                      | >400         | 25,200 (90.1%) | 20,319 (95.1%) | 5.0%     | 42,284 (93.6%) | 33,857 (94.9%) | 1.4% | 3.6%  | <0.001 |
|                      |              |                |                |          |                |                |      |       |        |
| <b>Heart failure</b> | <200         | 2,518 (73.7%)  | 2,200 (90.2%)  | 16.5%*** | 4,129 (78.9%)  | 4,024 (84.3%)  | 5.4% | 11.1% | <0.001 |
|                      | 200-400      | 8,455 (82.7%)  | 7,556 (91.7%)  | 9.0%     | 16,048 (84.1%) | 14,309 (89.4%) | 5.3% | 3.7%  | 0.01   |

|                            |         |                |                |         |                |                |      |      |        |
|----------------------------|---------|----------------|----------------|---------|----------------|----------------|------|------|--------|
|                            | >400    | 13,603 (86.3%) | 12,649 (92.3%) | 6.0%    | 20,426 (86.1%) | 18,476 (91.5%) | 5.4% | 0.6% | 0.65   |
|                            |         |                |                |         |                |                |      |      |        |
| <b>Pneumonia</b>           | <200    | 10,133 (78.0%) | 5,225 (88.0%)  | 10.1%   | 13,665 (78.1%) | 7,064 (85.0%)  | 6.8% | 3.3% | 0.04   |
|                            | 200-400 | 19,735 (74.9%) | 9,916 (86.5%)  | 11.6%   | 35,786 (75.8%) | 17,272 (83.4%) | 7.6% | 4.0% | 0.003  |
|                            | >400    | 20,911 (72.0%) | 10,737 (84.0%) | 12.0%   | 29,394 (73.3%) | 15,092 (80.5%) | 7.2% | 4.8% | <0.001 |
|                            |         |                |                |         |                |                |      |      |        |
| <b>All 10<br/>measures</b> | <200    | 15,461 (77.7%) | 10,795 (89.6%) | 11.9%** | 22,590 (80.4%) | 19,162 (85.4%) | 5.0% | 6.9% | <.001  |
|                            | 200-400 | 41,438 (81.9%) | 33,735 (91.0%) | 9.1%    | 77,687 (83.1%) | 63,607 (88.9%) | 5.8% | 3.3% | 0.001  |
|                            | >400    | 59,714 (83.0%) | 52,165 (90.9%) | 7.9%    | 92,104 (85.1%) | 83,036 (89.9%) | 4.9% | 3.0% | 0.002  |

# Student t test was performed to compare the absolute percentage change between teaching and non teaching hospitals. ANOVA was performed to compare the absolute percentage change among bed size groups.

\*  $p \leq 0.05$

\*\*  $p \leq 0.01$

\*\*\*  $p \leq 0.001$

§ Student t test was performed to compare the difference in absolute percentage change between pay-for-performance + public reporting and public reporting hospitals for each teaching or bed size group.
